# Supplementary material for: Decreased risk of knee buckling with adductor canal block versus femoral nerve block in total knee arthroplasty: a retrospective cohort study
Source: PubMed Central journal article supplement — Arthroplast Today. 2017 Apr 15;3(4):281–5. doi: 10.1016/j.artd.2017.02.008 (PMC5712030; doi:10.1016/j.artd.2017.02.008), 2017-04-15
Supplement: mmc1.pdf [file mmc1.pdf]

# CONFLICT OF INTEREST STATEMENT

## *Arthroplasty Today*

(Adopted from the American Academy of Orthopaedic Surgeons disclosure statement)

The following form **must be filled out completely and submitted by each author (example, 6 authors, 6 forms). If no discloser is required, please write/type "none" at the end of each sentence.**

---

Manuscript Title: Decreased Risk of Knee Buckling with Adductor Canal Block versus Femoral Nerve Block in TKA

1. Royalties from a company or supplier (The following conflicts were disclosed)  
NONE
2. Speakers bureau/paid presentations for a company or supplier (The following conflicts were disclosed)  
NONE
- 3A. Paid employee for a company or supplier (The following conflicts were disclosed)  
NONE
- 3B. Paid consultant for a company or supplier (The following conflicts were disclosed)  
NONE
- 3C. Unpaid consultants for a company or supplier (The following conflicts were disclosed)  
NONE
4. Stock or stock options in a company or supplier (The following conflicts were disclosed)  
NONE
5. Research support from a company or supplier as a Principal Investigator (The following conflicts were disclosed)  
NONE
6. Other financial or material support from a company or supplier (The following conflicts were disclosed)  
NONE
7. Royalties, financial or material support from publishers (The following conflicts were disclosed)  
NONE
8. Medical/Orthopaedic publications editorial/governing board (The following conflicts were disclosed)  
NONE
9. Board member/committee appointments for a society (The following conflicts were disclosed)  
NONE

**Each author must sign AND print or type his/her name, date and submit a separate form**

In addition, one BLINDED Conflict of Interest form (no author names used) should be submitted per manuscript with all author disclosures.

Ryan Thacher



8/19/16

---

Author Name (Print or Type)

Author Signature

Date

# CONFLICT OF INTEREST STATEMENT

## *Arthroplasty Today*

(Adopted from the American Academy of Orthopaedic Surgeons disclosure statement)

The following form **must be filled out completely and submitted by each author (example, 6 authors, 6 forms). If no discloser is required, please write/type "none" at the end of each sentence.**

---

Manuscript Title: Decreased Risk of Knee Buckling with Adductor Canal Block versus Femoral Nerve Block in TKA

1. Royalties from a company or supplier (The following conflicts were disclosed)  
NONE
2. Speakers bureau/paid presentations for a company or supplier (The following conflicts were disclosed)  
NONE
- 3A. Paid employee for a company or supplier (The following conflicts were disclosed)  
NONE
- 3B. Paid consultant for a company or supplier (The following conflicts were disclosed)  
NONE
- 3C. Unpaid consultants for a company or supplier (The following conflicts were disclosed)  
NONE
4. Stock or stock options in a company or supplier (The following conflicts were disclosed)  
NONE
5. Research support from a company or supplier as a Principal Investigator (The following conflicts were disclosed)  
NONE
6. Other financial or material support from a company or supplier (The following conflicts were disclosed)  
NONE
7. Royalties, financial or material support from publishers (The following conflicts were disclosed)  
NONE
8. Medical/Orthopaedic publications editorial/governing board (The following conflicts were disclosed)  
NONE
9. Board member/committee appointments for a society (The following conflicts were disclosed)  
NONE

**Each author must sign AND print or type his/her name, date and submit a separate form**

In addition, one BLINDED Conflict of Interest form (no author names used) should be submitted per manuscript with all author disclosures.

Robert Maniker



Aug 20, 2016

---

Author Name (Print or Type)

Author Signature

Date

# CONFLICT OF INTEREST STATEMENT

## *Arthroplasty Today*

(Adopted from the American Academy of Orthopaedic Surgeons disclosure statement)

The following form **must be filled out completely and submitted by each author (example, 6 authors, 6 forms). If no discloser is required, please write/type "none" at the end of each sentence.**

---

Manuscript Title: Decreased Risk of Knee Buckling with Adductor Canal Block versus Femoral Nerve Block in TKA

1. Royalties from a company or supplier (The following conflicts were disclosed) None
2. Speakers bureau/paid presentations for a company or supplier (The following conflicts were disclosed) None
- 3A. Paid employee for a company or supplier (The following conflicts were disclosed) None
- 3B. Paid consultant for a company or supplier (The following conflicts were disclosed)  
Orthosensor  
Smith and Nephew
- 3C. Unpaid consultants for a company or supplier (The following conflicts were disclosed) None
4. Stock or stock options in a company or supplier (The following conflicts were disclosed) None
5. Research support from a company or supplier as a Principal Investigator (The following conflicts were disclosed)  
Orthopaedic Scientific Research Foundation  
Orthosensor  
Smith and Nephew
6. Other financial or material support from a company or supplier (The following conflicts were disclosed) None
7. Royalties, financial or material support from publishers (The following conflicts were disclosed) None
8. Medical/Orthopaedic publications editorial/governing board (The following conflicts were disclosed)  
Clinical Orthopaedic and Related Research  
Journal of Arthroplasty
9. Board member/committee appointments for a society (The following conflicts were disclosed)  
American Association of Hip and Knee Surgeons  
American Association of Orthopaedic Surgeons

**Each author must sign AND print or type his/her name, date and submit a separate form**

In addition, one BLINDED Conflict of Interest form (no author names used) should be submitted per manuscript with all author disclosures.

---

Jeffrey Geller  
Author Name (Print or Type)



Author Signature

8/19/2016  
Date

# CONFLICT OF INTEREST STATEMENT

## *Arthroplasty Today*

(Adopted from the American Academy of Orthopaedic Surgeons disclosure statement)

The following form **must be filled out completely and submitted by each author (example, 6 authors, 6 forms). If no discloser is required, please write/type "none" at the end of each sentence.**

---

Manuscript Title: Decreased Risk of Knee Buckling with Adductor Canal Block versus Femoral Nerve Block in TKA

1. Royalties from a company or supplier (The following conflicts were disclosed) None
2. Speakers bureau/paid presentations for a company or supplier (The following conflicts were disclosed) None
- 3A. Paid employee for a company or supplier (The following conflicts were disclosed) None
- 3B. Paid consultant for a company or supplier (The following conflicts were disclosed)  
Link Orthopaedics
- 3C. Unpaid consultants for a company or supplier (The following conflicts were disclosed) None
4. Stock or stock options in a company or supplier (The following conflicts were disclosed) None
5. Research support from a company or supplier as a Principal Investigator (The following conflicts were disclosed)  
None
6. Other financial or material support from a company or supplier (The following conflicts were disclosed) None
7. Royalties, financial or material support from publishers (The following conflicts were disclosed) None
8. Medical/Orthopaedic publications editorial/governing board (The following conflicts were disclosed)None
9. Board member/committee appointments for a society (The following conflicts were disclosed)  
U.S. Food and Drug Administration

**Each author must sign AND print or type his/her name, date and submit a separate form**

In addition, one BLINDED Conflict of Interest form (no author names used) should be submitted per manuscript with all author disclosures.

Roshan Shah

Author Name (Print or Type)



Author Signature

8/19/2016

Date

# CONFLICT OF INTEREST STATEMENT

## *Arthroplasty Today*

(Adopted from the American Academy of Orthopaedic Surgeons disclosure statement)

The following form **must be filled out completely and submitted by each author (example, 6 authors, 6 forms). If no discloser is required, please write/type "none" at the end of each sentence.**

---

Manuscript Title: Decreased Risk of Knee Buckling with Adductor Canal Block versus Femoral Nerve Block in TKA

1. Royalties from a company or supplier (The following conflicts were disclosed)  
NONE
2. Speakers bureau/paid presentations for a company or supplier (The following conflicts were disclosed)  
NONE
- 3A. Paid employee for a company or supplier (The following conflicts were disclosed)  
NONE
- 3B. Paid consultant for a company or supplier (The following conflicts were disclosed)  
NONE
- 3C. Unpaid consultants for a company or supplier (The following conflicts were disclosed)  
NONE
4. Stock or stock options in a company or supplier (The following conflicts were disclosed)  
NONE
5. Research support from a company or supplier as a Principal Investigator (The following conflicts were disclosed)  
NONE
6. Other financial or material support from a company or supplier (The following conflicts were disclosed)  
NONE
7. Royalties, financial or material support from publishers (The following conflicts were disclosed)  
NONE
8. Medical/Orthopaedic publications editorial/governing board (The following conflicts were disclosed)  
NONE
9. Board member/committee appointments for a society (The following conflicts were disclosed)  
NONE

**Each author must sign AND print or type his/her name, date and submit a separate form**

In addition, one BLINDED Conflict of Interest form (no author names used) should be submitted per manuscript with all author disclosures.

Matthew Grosso

*Matthew Grosso*

8/22/16

---

Author Name (Print or Type)

Author Signature

Date

# CONFLICT OF INTEREST STATEMENT

## *Arthroplasty Today*

(Adopted from the American Academy of Orthopaedic Surgeons disclosure statement)

The following form **must be filled out completely and submitted by each author (example, 6 authors, 6 forms). If no discloser is required, please write/type "none" at the end of each sentence.**

---

Manuscript Title: Decreased Risk of Knee Buckling with Adductor Canal Block versus Femoral Nerve Block in TKA

1. Royalties from a company or supplier (The following conflicts were disclosed) NONE
2. Speakers bureau/paid presentations for a company or supplier (The following conflicts were disclosed) NONE
- 3A. Paid employee for a company or supplier (The following conflicts were disclosed) NONE
- 3B. Paid consultant for a company or supplier (The following conflicts were disclosed) NONE
- 3C. Unpaid consultants for a company or supplier (The following conflicts were disclosed) NONE
4. Stock or stock options in a company or supplier (The following conflicts were disclosed) NONE
5. Research support from a company or supplier as a Principal Investigator (The following conflicts were disclosed) NONE
6. Other financial or material support from a company or supplier (The following conflicts were disclosed) NONE
7. Royalties, financial or material support from publishers (The following conflicts were disclosed) NONE
8. Medical/Orthopaedic publications editorial/governing board (The following conflicts were disclosed) NONE
9. Board member/committee appointments for a society (The following conflicts were disclosed) NONE

**Each author must sign AND print or type his/her name, date and submit a separate form**

In addition, one BLINDED Conflict of Interest form (no author names used) should be submitted per manuscript with all author disclosures.

---

Thomas Hickernell  
Author Name (Print or Type)

Thomas Hickernell  
Author Signature

1/27/2017  
Date

# CONFLICT OF INTEREST STATEMENT

## *Arthroplasty Today*

(Adopted from the American Academy of Orthopaedic Surgeons disclosure statement)

The following form **must be filled out completely and submitted by each author (example, 6 authors, 6 forms). If no discloser is required, please write/type "none" at the end of each sentence.**

---

Manuscript Title: Decreased Risk of Knee Buckling with Adductor Canal Block versus Femoral Nerve Block in TKA

1. Royalties from a company or supplier (The following conflicts were disclosed) NONE
2. Speakers bureau/paid presentations for a company or supplier (The following conflicts were disclosed) NONE
- 3A. Paid employee for a company or supplier (The following conflicts were disclosed) NONE
- 3B. Paid consultant for a company or supplier (The following conflicts were disclosed) NONE
- 3C. Unpaid consultants for a company or supplier (The following conflicts were disclosed) NONE
4. Stock or stock options in a company or supplier (The following conflicts were disclosed) NONE
5. Research support from a company or supplier as a Principal Investigator (The following conflicts were disclosed) NONE
6. Other financial or material support from a company or supplier (The following conflicts were disclosed) NONE
7. Royalties, financial or material support from publishers (The following conflicts were disclosed) NONE
8. Medical/Orthopaedic publications editorial/governing board (The following conflicts were disclosed) NONE
9. Board member/committee appointments for a society (The following conflicts were disclosed) NONE

**Each author must sign AND print or type his/her name, date and submit a separate form**

In addition, one BLINDED Conflict of Interest form (no author names used) should be submitted per manuscript with all author disclosures.

---

|                             |                  |           |
|-----------------------------|------------------|-----------|
| Anthony Brown               | Anthony Brown    | 1/27/2017 |
| Author Name (Print or Type) | Author Signature | Date      |

# CONFLICT OF INTEREST STATEMENT

## *Arthroplasty Today*

(Adopted from the American Academy of Orthopaedic Surgeons disclosure statement)

The following form **must be filled out completely and submitted by each author (example, 6 authors, 6 forms). If no discloser is required, please write/type "none" at the end of each sentence.**

---

Manuscript Title: Decreased Risk of Knee Buckling with Adductor Canal Block versus Femoral Nerve Block in TKA

1. Royalties from a company or supplier (The following conflicts were disclosed)  
Corin U.S.A.
2. Speakers bureau/paid presentations for a company or supplier (The following conflicts were disclosed)  
KCI
  
- 3A. Paid employee for a company or supplier (The following conflicts were disclosed) NONE
  
- 3B. Paid consultant for a company or supplier (The following conflicts were disclosed)  
Corin U.S.A  
KCI Medical Canada  
KCI USA, Inc  
Medacta USA  
Zimmer-Biomet.
  
- 3C. Unpaid consultants for a company or supplier (The following conflicts were disclosed) NONE
4. Stock or stock options in a company or supplier (The following conflicts were disclosed) NONE
5. Research support from a company or supplier as a Principal Investigator (The following conflicts were disclosed)  
KCI
6. Other financial or material support from a company or supplier (The following conflicts were disclosed) NONE
7. Royalties, financial or material support from publishers (The following conflicts were disclosed) NONE
8. Medical/Orthopaedic publications editorial/governing board (The following conflicts were disclosed) NONE  
Journal of Arthroplasty  
Journal of Bone and Joint Surgery - American
9. Board member/committee appointments for a society (The following conflicts were disclosed)  
AAOS

**Each author must sign AND print or type his/her name, date and submit a separate form**

In addition, one BLINDED Conflict of Interest form (no author names used) should be submitted per manuscript with all author disclosures.

---

|                             |                  |           |
|-----------------------------|------------------|-----------|
| John Cooper                 | John Cooper      | 1/27/2017 |
| Author Name (Print or Type) | Author Signature | Date      |
